# Supplementary material for: Antibody Profiling of Microbial Antigens in the Blood of COVID-19 mRNA Vaccine Recipients Using Microbial Protein Microarrays
Source: MDPI journal article supplement (doi:10.3390/vaccines11111694), 2023-11-07
Supplement: s1 [file s1]

Supplementary Table S5 Temporary changes of the microbial antibodies with highest SHAP values

| Name of Microorganisms                             | A    |      |      |      | B    |      |      |      | C    |      |      |      | D    |      |      |      | E    |      |      |      | F    |      |      |      | G    |      |      |      | H    |      |      |      | I    |      |      |      |
|----------------------------------------------------|------|------|------|------|------|------|------|------|------|------|------|------|------|------|------|------|------|------|------|------|------|------|------|------|------|------|------|------|------|------|------|------|------|------|------|------|
|                                                    | 1st  | 2nd  | 3rd  | 4th  |
| Staphylococcus aureus                              | 8.10 | 8.06 | 7.63 | 8.26 | 4.27 | 4.10 | 3.76 | 4.36 | 6.89 | 6.67 | 6.17 | 6.08 | 4.73 | 3.86 | 2.64 | 0.00 | 6.87 | 7.73 | 6.25 | 6.77 | 5.30 | 4.76 | 4.48 | 5.88 | 4.46 | 4.13 | 3.48 | 4.40 | 5.23 | 5.32 | 4.65 | 5.06 | 6.23 | 6.12 | 5.92 | 6.22 |
| Influenza B virus                                  | 5.51 | 6.08 | 5.43 | 5.63 | 5.04 | 6.88 | 5.81 | 5.31 | 5.58 | 7.48 | 6.03 | 5.63 | 6.71 | 9.45 | 8.30 | 7.07 | 3.82 | 4.63 | 3.39 | 3.61 | 2.93 | 3.32 | 2.67 | 3.24 | 4.06 | 5.50 | 4.61 | 4.61 | 4.23 | 5.13 | 3.80 | 4.74 | 4.55 | 5.46 | 4.62 | 4.71 |
| Rubella virus                                      | 6.68 | 6.46 | 6.56 | 6.60 | 4.67 | 4.61 | 4.46 | 4.44 | 7.82 | 7.73 | 7.74 | 7.86 | 4.44 | 4.93 | 4.40 | 4.39 | 7.11 | 7.17 | 5.39 | 4.91 | 5.94 | 5.64 | 5.66 | 0.86 | 2.66 | 2.62 | 2.21 | 3.17 | 3.23 | 3.38 | 3.53 | 3.67 | 3.56 | 3.41 | 3.24 | 3.35 |
| Influenza A virus H11N6<br>(A/duck/England/1/1956) | 5.32 | 6.10 | 5.77 | 5.61 | 5.00 | 7.61 | 5.83 | 5.46 | 6.76 | 8.43 | 7.98 | 6.97 | 5.87 | 8.77 | 8.21 | 6.41 | 2.71 | 3.38 | 3.55 | 3.50 | 4.82 | 4.89 | 4.78 | 4.00 | 3.82 | 4.25 | 4.19 | 4.19 | 4.60 | 5.58 | 4.51 | 4.68 | 3.58 | 4.70 | 3.65 | 3.91 |
| Meyerozyma guilliermondii                          | 3.28 | 3.86 | 3.35 | 3.52 | 4.66 | 4.74 | 4.14 | 4.79 | 4.32 | 4.22 | 4.62 | 4.88 | 0.00 | 0.00 | 0.00 | 0.00 | 3.10 | 3.25 | 3.92 | 4.13 | 4.61 | 4.36 | 4.49 | 3.73 | 3.91 | 2.82 | 3.18 | 2.77 | 0.00 | 0.00 | 0.00 | 0.00 | 3.19 | 3.16 | 2.87 | 3.50 |
| Influenza B virus                                  | 4.54 | 4.90 | 4.68 | 4.63 | 4.17 | 5.97 | 4.67 | 4.43 | 4.52 | 6.13 | 4.98 | 4.61 | 5.73 | 8.28 | 7.09 | 5.91 | 2.85 | 3.68 | 2.73 | 3.00 | 2.06 | 2.57 | 1.85 | 2.43 | 3.51 | 4.66 | 3.92 | 3.90 | 3.52 | 4.35 | 3.02 | 4.03 | 3.78 | 4.68 | 3.78 | 3.85 |
| Legionella cardiaca                                | 1.26 | 1.11 | 0.99 | 1.44 | 3.89 | 3.63 | 4.06 | 3.86 | 3.49 | 3.70 | 3.56 | 3.36 | 1.16 | 1.31 | 1.26 | 1.13 | 1.30 | 1.29 | 0.82 | 0.39 | 0.49 | 0.77 | 0.78 | 2.69 | 0.33 | 0.36 | 0.31 | 0.15 | 3.42 | 3.48 | 3.36 | 3.73 | 1.53 | 1.52 | 1.33 | 1.59 |
| Francisella philomiragia                           | 6.04 | 6.99 | 6.94 | 6.00 | 2.31 | 2.54 | 2.83 | 2.20 | 6.50 | 6.78 | 6.61 | 6.49 | 7.35 | 7.49 | 7.24 | 7.43 | 5.53 | 5.61 | 4.74 | 4.47 | 4.47 | 4.41 | 4.42 | 0.63 | 1.65 | 1.76 | 1.36 | 1.91 | 3.21 | 3.32 | 3.25 | 3.42 | 5.01 | 4.89 | 4.87 | 4.97 |
| Rubella virus                                      | 5.91 | 5.97 | 6.03 | 6.18 | 4.00 | 4.06 | 4.21 | 4.20 | 7.41 | 7.51 | 7.16 | 7.33 | 4.26 | 4.51 | 4.50 | 4.10 | 6.95 | 6.76 | 5.14 | 4.66 | 5.53 | 5.47 | 5.45 | 0.67 | 2.43 | 2.56 | 1.94 | 3.17 | 3.37 | 3.20 | 3.01 | 3.66 | 3.50 | 3.55 | 2.89 | 3.63 |
| Influenza A virus H7N9<br>(A/Anhui/1/2013)         | 4.76 | 5.18 | 5.08 | 4.79 | 4.50 | 6.05 | 5.16 | 4.75 | 5.14 | 6.49 | 5.83 | 5.34 | 5.46 | 6.90 | 6.55 | 5.53 | 2.50 | 2.92 | 2.14 | 1.81 | 3.71 | 3.72 | 3.80 | 2.78 | 1.91 | 2.71 | 2.23 | 2.43 | 2.72 | 3.40 | 2.65 | 3.06 | 3.00 | 3.57 | 3.03 | 3.13 |

Changes in the level of antibodies against various mirioorganisms with highest SHAP values over time. In the Table, 1, 2, 3 and 4 represent the first, second, third and fourth blood sample collections, respectively. The fluorecence intensity ratios of relative values against the negative controls are indicated as relative log<sub>2</sub> ratios and represented by the red intensity in the figure.
